# Supplementary material
Source: HighWire-hosted journal article supplement (https://erj.ersjournals.com/content/56/1/2000320)
Supplement: inline-supplementary-material-1 [file inline-supplementary-material-1.pdf]

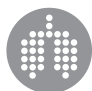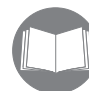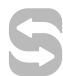

SHAREABLE PDF

# Radiotherapy in the era of immunotherapy: teaching an old dog new tricks

B.C. John Cho <sup>1</sup> and Marc de Perrot<sup>2</sup>

**Affiliations:** <sup>1</sup>Dept of Radiation Oncology, Princess Margaret Cancer Centre, University Health Network, Toronto, ON, Canada. <sup>2</sup>Division of Thoracic Surgery, Princess Margaret Cancer Centre, University Health Network, Toronto, ON, Canada.

**Correspondence:** B.C. John Cho, Dept of Radiation Oncology, OPG, 7-218, 700 University Av, Toronto, ON M5G 1Z5, Canada. E-mail: john.cho@rmp.uhn.ca

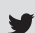

@ERSpublications

**Potentiating abscopal and vaccinal effects through combination immunoradiotherapy** <https://bit.ly/35Ewzv3>

**Cite this article as:** Cho BCJ, de Perrot M. Radiotherapy in the era of immunotherapy: teaching an old dog new tricks. *Eur Respir J* 2020; 56: 2000320 [<https://doi.org/10.1183/13993003.00320-2020>].

This single-page version can be shared freely online.

The era of immunotherapy is revolutionising the treatment of solid tumours, as well as shifting the radiotherapeutic paradigm. Radiation that can boost the immune system, with non-ablative doses, provide new and exciting opportunities, such as the ability to generate an *in situ* vaccination. Specifically, we are interested in effecting a systemic (abscopal) response when combined with immunotherapy, and a durable (vaccinal) response when combined with surgery.
